# Supplementary material for: Growth type and relative condition factor as a function of the body shape of deep-water crustaceans in the Colombian Caribbean Sea
Source: PeerJ. 2024 Jan 15;12:e16583. doi: 10.7717/peerj.16583 (PMC10795526; doi:10.7717/peerj.16583)
Supplement: Supplemental Information 1 [file peerj-12-16583-s001.xlsx]

## Sheet: Hoja1
Species	length	weight
Acanthocarpus alexandri	28.56	10.9
Acanthocarpus alexandri	25.54	5.9
Acanthocarpus alexandri	34.23	22.3
Acanthocarpus alexandri	32.85	17.9
Acanthocarpus alexandri	50.92	76.5
Acanthocarpus alexandri	39.61	39.7
Acanthocarpus alexandri	47.79	61.6
Acanthocarpus alexandri	46.02	34.7
Acanthocarpus alexandri	42.29	28.6
Acanthocarpus alexandri	31.8	14.1
Acanthocarpus alexandri	42.8	40.2
Acanthocarpus alexandri	43.5	42.3
Achelous spinicarpus	22.3	4.4
Achelous spinicarpus	18.31	2.3
Achelous spinicarpus	16.32	2.1
Achelous spinicarpus	27.02	10
Achelous spinicarpus	22.48	5.9
Achelous spinicarpus	19.31	2.9
Achelous spinicarpus	35.88	22.3
Achelous spinicarpus	32.06	16.4
Achelous spinicarpus	24.05	9
Achelous spinicarpus	30.16	21.2
Achelous spinicarpus	23.24	7.1
Achelous spinicarpus	25.09	7.6
Achelous spinicarpus	24.01	8.9
Achelous spinicarpus	18.86	3
Achelous spinicarpus	15.92	1.8
Achelous spinicarpus	22.26	5
Achelous spinicarpus	23.05	7.2
Achelous spinicarpus	23.64	6.9
Achelous spinicarpus	15.7	2.1
Achelous spinicarpus	18.75	3.1
Achelous spinicarpus	26.5	6.1
Achelous spinicarpus	22.34	4.3
Achelous spinicarpus	15.36	1.8
Achelous spinicarpus	21.35	6.1
Achelous spinicarpus	25.01	7.3
Achelous spinicarpus	22.23	6.7
Achelous spinicarpus	21.59	4.7
Achelous spinicarpus	20.99	5.4
Achelous spinicarpus	23.36	8.6
Achelous spinicarpus	23.04	7.3
Achelous spinicarpus	16.73	3
Achelous spinicarpus	23.49	5.4
Achelous spinicarpus	23.02	5.8
Achelous spinicarpus	22.06	5.5
Achelous spinicarpus	21.2	5.3
Achelous spinicarpus	22.91	7.4
Achelous spinicarpus	21.04	4.2
Achelous spinicarpus	24.21	6
Achelous spinicarpus	19.83	4.4
Achelous spinicarpus	20.88	5.9
Achelous spinicarpus	25.12	8.1
Achelous spinicarpus	14.44	1.8
Achelous spinicarpus	17.12	1.7
Achelous spinicarpus	22.79	6.2
Achelous spinicarpus	24.72	7.2
Achelous spinicarpus	23.38	8.9
Achelous spinicarpus	21.58	4.1
Achelous spinicarpus	22.88	6
Achelous spinicarpus	20.64	5.9
Achelous spinicarpus	23.66	7.4
Achelous spinicarpus	21.62	4.8
Achelous spinicarpus	14.53	1.9
Achelous spinicarpus	23.01	5.8
Achelous spinicarpus	22.21	6.3
Achelous spinicarpus	14.31	1.4
Achelous spinicarpus	23.27	6.6
Achelous spinicarpus	22.19	6.4
Achelous spinicarpus	22.22	7.9
Achelous spinicarpus	22.39	5.9
Achelous spinicarpus	22.49	6
Achelous spinicarpus	24.51	9.2
Achelous spinicarpus	24.29	8.2
Achelous spinicarpus	23.99	6.9
Achelous spinicarpus	18.94	3.1
Achelous spinicarpus	24.26	7.1
Achelous spinicarpus	23.43	6.9
Achelous spinicarpus	23.39	8.7
Achelous spinicarpus	20.31	4.3
Achelous spinicarpus	21.3	5.3
Achelous spinicarpus	21.15	7.2
Achelous spinicarpus	24.23	8.1
Achelous spinicarpus	13.72	1.3
Achelous spinicarpus	19.75	5
Achelous spinicarpus	23.18	7.6
Achelous spinicarpus	15.34	2.4
Achelous spinicarpus	16.6	1.7
Achelous spinicarpus	13.59	1.8
Achelous spinicarpus	15.3	2.1
Achelous spinicarpus	14.73	2.3
Achelous spinicarpus	22.81	5.7
Achelous spinicarpus	16.63	3
Achelous spinicarpus	23.98	8
Achelous spinicarpus	18.47	3.9
Achelous spinicarpus	19.09	2.8
Achelous spinicarpus	31.76	16
Achelous spinicarpus	35.11	17.8
Achelous spinicarpus	31.87	12.3
Achelous spinicarpus	25.19	8.4
Achelous spinicarpus	28.21	13.6
Achelous spinicarpus	28.36	7.6
Achelous spinicarpus	27.26	10.6
Achelous spinicarpus	31.59	24.9
Achelous spinicarpus	34.17	20.4
Achelous spinicarpus	33.91	20
Achelous spinicarpus	21.94	5.7
Achelous spinicarpus	26.15	11.6
Achelous spinicarpus	25.48	12.3
Achelous spinicarpus	24.4	7.8
Achelous spinicarpus	25.36	6.6
Achelous spinicarpus	21.36	5.1
Achelous spinicarpus	28.59	11
Achelous spinicarpus	23.49	6.5
Achelous spinicarpus	23.73	5.6
Achelous spinicarpus	18.61	2.4
Achelous spinicarpus	26.8	9
Achelous spinicarpus	24.99	6.8
Achelous spinicarpus	23.39	6.8
Achelous spinicarpus	24.24	7.6
Achelous spinicarpus	25.51	8.2
Achelous spinicarpus	24.96	10.3
Achelous spinicarpus	16.77	2.6
Achelous spinicarpus	22.82	6.7
Achelous spinicarpus	27.4	7.9
Achelous spinicarpus	24.57	6.8
Achelous spinicarpus	23.31	8.2
Achelous spinicarpus	22.28	5.6
Achelous spinicarpus	28.05	12.5
Achelous spinicarpus	16.39	2.9
Achelous spinicarpus	21.8	4.6
Achelous spinicarpus	31.7	20.4
Achelous spinicarpus	22.74	5.9
Achelous spinicarpus	33.29	18.6
Achelous spinicarpus	35.85	20.5
Achelous spinicarpus	26.8	12.1
Achelous spinicarpus	26.25	10.6
Achelous spinicarpus	33.98	19.5
Achelous spinicarpus	29.74	10.4
Achelous spinicarpus	28.01	14.6
Achelous spinicarpus	30.9	17
Achelous spinicarpus	28.19	12.1
Achelous spinicarpus	29.31	10.3
Achelous spinicarpus	26.73	10.2
Achelous spinicarpus	29.91	14.9
Achelous spinicarpus	25.42	9.2
Achelous spinicarpus	29.39	13.7
Achelous spinicarpus	30.97	16.1
Achelous spinicarpus	33.03	20
Achelous spinicarpus	30.1	17
Achelous spinicarpus	30.64	17.2
Achelous spinicarpus	33	18.3
Achelous spinicarpus	31.76	14.8
Achelous spinicarpus	29.58	10.4
Achelous spinicarpus	31.15	14.3
Achelous spinicarpus	24.29	5.8
Achelous spinicarpus	23.83	6.4
Achelous spinicarpus	21.27	5.5
Achelous spinicarpus	28.56	10.2
Achelous spinicarpus	21.21	3
Achelous spinicarpus	16.13	2.2
Achelous spinicarpus	19.53	3.3
Achelous spinicarpus	26.86	7.6
Achelous spinicarpus	24.16	5.1
Achelous spinicarpus	19.38	3
Achelous spinicarpus	16.7	2.5
Achelous spinicarpus	19.88	3
Achelous spinicarpus	26.1	9.1
Achelous spinicarpus	26.18	7.2
Achelous spinicarpus	26.49	8
Achelous spinicarpus	33.81	15.3
Achelous spinicarpus	30.7	12.9
Achelous spinicarpus	24.76	6.3
Achelous spinicarpus	28.71	9
Achelous spinicarpus	26.27	10.6
Achelous spinicarpus	24.04	5.3
Achelous spinicarpus	24.38	6.1
Achelous spinicarpus	25.79	8.1
Achelous spinicarpus	33.45	18.1
Achelous spinicarpus	22.66	5
Achelous spinicarpus	24.55	8.1
Achelous spinicarpus	25.33	5.3
Achelous spinicarpus	26.37	9.7
Achelous spinicarpus	26.07	7
Achelous spinicarpus	24.07	6
Achelous spinicarpus	23.37	5.6
Achelous spinicarpus	23.32	4.8
Achelous spinicarpus	24.91	5.2
Achelous spinicarpus	26.56	8.6
Achelous spinicarpus	31.09	13
Achelous spinicarpus	25.34	7.9
Achelous spinicarpus	24.59	7.9
Achelous spinicarpus	25.92	8.2
Achelous spinicarpus	26.32	10.1
Achelous spinicarpus	28.35	8.7
Achelous spinicarpus	21.43	6.2
Achelous spinicarpus	24.57	6.7
Achelous spinicarpus	23.44	6.3
Achelous spinicarpus	25.4	7.6
Achelous spinicarpus	26.05	7.8
Achelous spinicarpus	26.68	6.1
Achelous spinicarpus	28.7	8.5
Achelous spinicarpus	24.41	6.8
Achelous spinicarpus	23.11	4.6
Achelous spinicarpus	23.23	5.7
Achelous spinicarpus	21.01	4.5
Achelous spinicarpus	22.86	4.2
Achelous spinicarpus	26.96	8.9
Achelous spinicarpus	26.57	9.7
Achelous spinicarpus	23.9	6.8
Achelous spinicarpus	25.68	9.1
Achelous spinicarpus	24	5.2
Achelous spinicarpus	26.75	8.5
Achelous spinicarpus	26.17	8
Achelous spinicarpus	22.05	4.4
Achelous spinicarpus	23.69	6.2
Achelous spinicarpus	24.63	5.6
Achelous spinicarpus	22.2	5.9
Achelous spinicarpus	23.55	6.5
Achelous spinicarpus	23.36	4.7
Achelous spinicarpus	26.82	8.1
Achelous spinicarpus	26.65	5.7
Achelous spinicarpus	24.16	5.5
Achelous spinicarpus	20.72	3.6
Achelous spinicarpus	31.89	23.4
Achelous spinicarpus	29.53	11.8
Achelous spinicarpus	26.26	10.3
Achelous spinicarpus	29.06	15.2
Achelous spinicarpus	29.3	14.4
Achelous spinicarpus	20.54	3.9
Achelous spinicarpus	20.55	4.8
Achelous spinicarpus	21.21	5
Achelous spinicarpus	27.73	14
Achelous spinicarpus	28.54	13.3
Achelous spinicarpus	25.75	7
Achelous spinicarpus	31.7	17.7
Achelous spinicarpus	25.64	9.1
Achelous spinicarpus	26.55	9.7
Achelous spinicarpus	20.98	5.7
Achelous spinicarpus	27.24	10.4
Achelous spinicarpus	19.57	3.4
Achelous spinicarpus	28.35	10.7
Achelous spinicarpus	19.45	5
Achelous spinicarpus	23.87	6.2
Achelous spinicarpus	28.62	16.6
Achelous spinicarpus	28.06	12.9
Achelous spinicarpus	20.26	4.1
Achelous spinicarpus	21.72	5.8
Achelous spinicarpus	22.82	6.4
Achelous spinicarpus	25.48	9.1
Achelous spinicarpus	24.63	7.6
Achelous spinicarpus	24.46	7.9
Achelous spinicarpus	17.86	3.1
Achelous spinicarpus	20.6	4.8
Achelous spinicarpus	24.14	6.8
Achelous spinicarpus	16.6	2.5
Achelous spinicarpus	21.14	3.3
Achelous spinicarpus	15.78	2.3
Achelous spinicarpus	24.74	6.9
Achelous spinicarpus	27.37	11.3
Achelous spinicarpus	30.32	16.9
Achelous spinicarpus	26.31	10.6
Achelous spinicarpus	18.83	3.6
Achelous spinicarpus	24.05	6.9
Achelous spinicarpus	29.67	13
Achelous spinicarpus	32.28	18.6
Achelous spinicarpus	23.88	5.3
Achelous spinicarpus	33.65	18.9
Achelous spinicarpus	30.49	11.3
Achelous spinicarpus	32.55	17
Achelous spinicarpus	33.92	15.2
Achelous spinicarpus	18.2	3.4
Achelous spinicarpus	34.28	17.4
Achelous spinicarpus	28.7	12.3
Achelous spinicarpus	24.2	7.1
Achelous spinicarpus	27.1	10.2
Achelous spinicarpus	31.5	16.5
Achelous spinicarpus	31.6	16.6
Achelous spinicarpus	29.4	13.3
Achelous spinicarpus	33.6	20.2
Achelous spinicarpus	37.9	29.85
Achelous spinicarpus	37.6	29
Achelous spinicarpus	31.1	15.9
Achelous spinicarpus	23.6	6.6
Achelous spinicarpus	30	14.1
Achelous spinicarpus	29.8	13.9
Achelous spinicarpus	27.3	10.4
Achelous spinicarpus	50.19	43.8
Achelous spinicarpus	43.42	37.6
Achelous spinicarpus	30.3	19.5
Achelous spinicarpus	27.7	11.1
Achelous spinicarpus	28.7	15.1
Achelous spinicarpus	31.29	13.5
Achelous spinicarpus	29.02	16.3
Achelous spinicarpus	31.51	14.1
Achelous spinicarpus	27.25	12
Achelous spinicarpus	30.06	16.7
Achelous spinicarpus	24.82	7.8
Achelous spinicarpus	25.42	10.7
Achelous spinicarpus	29.25	15.9
Achelous spinicarpus	28.77	13.4
Achelous spinicarpus	29.73	14.9
Achelous spinicarpus	22.73	7.1
Achelous spinicarpus	21.87	4.4
Achelous spinicarpus	22.46	6.5
Achelous spinicarpus	25.6	8.5
Achelous spinicarpus	24.2	7.1
Achelous spinicarpus	20.4	4.1
Achelous spinicarpus	21.4	4.8
Achelous spinicarpus	18.1	2.8
Achelous spinicarpus	21.4	4.8
Achelous spinicarpus	25.5	8.4
Achelous spinicarpus	21.7	5
Achelous spinicarpus	26.6	9.6
Achelous spinicarpus	26.8	9.8
Achelous spinicarpus	28.4	11.9
Achelous spinicarpus	25.3	8.2
Achelous spinicarpus	27.6	10.8
Achelous spinicarpus	24.9	7.8
Achelous spinicarpus	19.6	3.6
Achelous spinicarpus	16.3	2
Achelous spinicarpus	22.2	5.4
Achelous spinicarpus	28.3	11.7
Achelous spinicarpus	22.3	5.5
Achelous spinicarpus	19.9	3.8
Achelous spinicarpus	28.1	11.5
Achelous spinicarpus	27.6	10.8
Achelous spinicarpus	25.1	8
Achelous spinicarpus	19.4	3.5
Achelous spinicarpus	19.2	3.4
Achelous spinicarpus	28.1	11.5
Achelous spinicarpus	19.9	3.8
Achelous spinicarpus	21	4.5
Achelous spinicarpus	22.2	5.4
Achelous spinicarpus	28	11.3
Achelous spinicarpus	24.1	7
Achelous spinicarpus	27.7	11
Achelous spinicarpus	18.1	2.8
Achelous spinicarpus	24.5	7.4
Achelous spinicarpus	26.1	9.1
Achelous spinicarpus	25.5	8.4
Achelous spinicarpus	25.1	8
Achelous spinicarpus	21.5	4.9
Achelous spinicarpus	18.3	2.9
Achelous spinicarpus	26.7	9.7
Achelous spinicarpus	21.1	4.6
Achelous spinicarpus	19.9	3.8
Achelous spinicarpus	23.9	6.8
Achelous spinicarpus	21	4.5
Achelous spinicarpus	23.8	6.7
Achelous spinicarpus	24.9	7.8
Achelous spinicarpus	23.3	6.3
Achelous spinicarpus	22.9	6
Achelous spinicarpus	18.1	2.8
Achelous spinicarpus	25.1	8
Achelous spinicarpus	29.2	12.9
Achelous spinicarpus	25.3	8.2
Achelous spinicarpus	20.2	4
Achelous spinicarpus	27.8	11.1
Achelous spinicarpus	25.8	8.7
Achelous spinicarpus	21.5	4.9
Achelous spinicarpus	22.6	5.7
Achelous spinicarpus	25.1	8
Achelous spinicarpus	20.4	4.1
Achelous spinicarpus	21.1	4.6
Achelous spinicarpus	26.2	9.2
Achelous spinicarpus	21.3	4.7
Achelous spinicarpus	19.2	3.4
Achelous spinicarpus	22.8	5.9
Achelous spinicarpus	19.2	3.4
Antillimunida evermanni	41.79	4.5
Antillimunida evermanni	42.47	2.6
Antillimunida evermanni	41	3
Antillimunida evermanni	40.44	2.3
Antillimunida evermanni	37.16	1.7
Antillimunida evermanni	44.98	5.6
Antillimunida evermanni	48.68	7.8
Antillimunida evermanni	45.3	5
Antillimunida evermanni	45.48	4.9
Antillimunida evermanni	44.86	3.6
Antillimunida evermanni	45.88	3.3
Antillimunida evermanni	47.36	3.8
Antillimunida evermanni	45.24	5.6
Antillimunida evermanni	52.19	7.5
Antillimunida evermanni	50.49	4.8
Antillimunida evermanni	52.49	6.7
Antillimunida evermanni	42.04	3.1
Antillimunida evermanni	49.57	5.2
Antillimunida evermanni	49.24	3.1
Antillimunida evermanni	49.13	6.7
Antillimunida evermanni	45.1	3.6
Antillimunida evermanni	49.48	5
Antillimunida evermanni	50.34	4.4
Antillimunida evermanni	41.92	3.9
Antillimunida evermanni	40.28	3.6
Antillimunida evermanni	39.6	3.9
Antillimunida evermanni	40.82	3.9
Antillimunida evermanni	40.53	4
Antillimunida evermanni	42.68	5.2
Antillimunida evermanni	41.7	2.9
Antillimunida evermanni	58.23	8
Antillimunida evermanni	60.04	10.1
Antillimunida evermanni	66.14	13.2
Antillimunida evermanni	66.35	17.3
Antillimunida evermanni	43.85	4.2
Antillimunida evermanni	45.42	5.2
Antillimunida evermanni	43.39	3.8
Antillimunida evermanni	40.55	3.1
Antillimunida evermanni	34.31	1.5
Antillimunida evermanni	45.93	4.6
Antillimunida evermanni	73.26	17.9
Antillimunida evermanni	54.23	8.1
Antillimunida evermanni	45.98	4.8
Antillimunida evermanni	45.82	4
Antillimunida evermanni	47	3.8
Antillimunida evermanni	39.5	2.5
Antillimunida evermanni	18.33	0.3
Antillimunida evermanni	50.59	4.2
Antillimunida evermanni	53.65	5.9
Antillimunida evermanni	49.06	5.5
Antillimunida evermanni	53.79	6.1
Antillimunida evermanni	45.85	5
Antillimunida evermanni	52.14	5
Antillimunida evermanni	44.86	4
Antillimunida evermanni	46.95	4.1
Antillimunida evermanni	42.31	3.6
Antillimunida evermanni	43.59	3.1
Antillimunida evermanni	46.97	3.6
Antillimunida evermanni	47.1	4.6
Antillimunida evermanni	45.86	3
Antillimunida evermanni	49.73	3.8
Antillimunida evermanni	40.64	2.7
Antillimunida evermanni	45.58	3.5
Antillimunida evermanni	41.26	2.7
Antillimunida evermanni	45.32	3
Antillimunida evermanni	45.64	3.5
Antillimunida evermanni	43.7	2.3
Antillimunida evermanni	50.42	4.2
Antillimunida evermanni	36.07	2.1
Antillimunida flinti	45.35	5.4
Antillimunida flinti	46.14	4.9
Antillimunida flinti	46.77	5.8
Antillimunida flinti	55.92	6.1
Antillimunida flinti	52.94	5.2
Antillimunida flinti	43.21	3.4
Antillimunida flinti	48.84	4
Antillimunida flinti	40.81	1.9
Antillimunida flinti	36.45	2.1
Antillimunida flinti	54.03	6.2
Antillimunida flinti	56.41	5.5
Antillimunida flinti	55.33	5.1
Aristaeomorpha foliacea	175	26.2
Aristaeomorpha foliacea	122.86	13.8
Aristaeomorpha foliacea	126.8	11.1
Aristaeomorpha foliacea	111.1	5.7
Aristaeomorpha foliacea	135	17.5
Aristaeomorpha foliacea	154	18.6
Aristaeomorpha foliacea	164	31.1
Aristaeomorpha foliacea	134.2	13.5
Aristaeomorpha foliacea	150	23.7
Aristaeomorpha foliacea	141	18.2
Aristaeomorpha foliacea	200	49.1
Aristaeomorpha foliacea	176	30.7
Aristaeomorpha foliacea	114.71	11.8
Aristaeomorpha foliacea	142.04	22.4
Aristaeomorpha foliacea	136.8	14.4
Aristaeomorpha foliacea	145.9	18
Aristaeomorpha foliacea	90.55	3.6
Aristaeomorpha foliacea	82.4	2.5
Aristaeomorpha foliacea	127.69	15.7
Aristaeomorpha foliacea	180.9	37.9
Aristaeomorpha foliacea	122.86	16.8
Aristaeomorpha foliacea	144.26	26.1
Aristaeomorpha foliacea	136.56	21.9
Aristaeomorpha foliacea	90.14	3.9
Aristaeomorpha foliacea	170	30.3
Aristaeomorpha foliacea	142.7	16.7
Aristaeomorpha foliacea	161	26.8
Aristaeomorpha foliacea	138	14
Aristaeomorpha foliacea	175	28.8
Aristaeomorpha foliacea	162	22
Aristaeomorpha foliacea	172	19.8
Aristaeomorpha foliacea	140	17.3
Aristaeomorpha foliacea	172.1	31.9
Aristaeomorpha foliacea	160	22.4
Aristaeomorpha foliacea	172	25.8
Aristaeomorpha foliacea	123.52	14.6
Aristaeomorpha foliacea	115.68	10.7
Aristaeomorpha foliacea	133.14	18.1
Aristaeomorpha foliacea	127.52	14.4
Aristaeomorpha foliacea	123.73	11.4
Aristaeomorpha foliacea	130.56	17.2
Aristaeomorpha foliacea	122.9	15.4
Aristaeomorpha foliacea	129.32	14.4
Aristaeomorpha foliacea	175	27.9
Aristaeomorpha foliacea	170	30
Aristaeomorpha foliacea	170	27.8
Aristaeomorpha foliacea	144.08	15.4
Aristaeomorpha foliacea	181	34
Aristaeomorpha foliacea	165	27.2
Aristaeomorpha foliacea	132.15	16.7
Aristaeomorpha foliacea	152.3	20.9
Aristaeomorpha foliacea	150	18.9
Aristaeomorpha foliacea	163	21
Aristaeomorpha foliacea	130.22	15.5
Aristaeomorpha foliacea	142	22.1
Aristaeomorpha foliacea	140.93	20.9
Aristaeomorpha foliacea	129.24	15.3
Aristaeomorpha foliacea	119.72	13.5
Aristaeomorpha foliacea	161	19.4
Aristaeomorpha foliacea	130	16.1
Aristaeomorpha foliacea	118.86	12
Aristaeomorpha foliacea	210	44.7
Aristaeomorpha foliacea	167	29.6
Aristaeomorpha foliacea	135	20
Aristaeomorpha foliacea	179	34.7
Aristaeomorpha foliacea	190	41.1
Aristaeomorpha foliacea	165.9	28.1
Aristaeomorpha foliacea	175	29
Aristaeomorpha foliacea	174	21.6
Aristaeomorpha foliacea	141	23.7
Aristaeomorpha foliacea	120.19	8.2
Aristaeomorpha foliacea	119.62	11.6
Aristaeomorpha foliacea	160	24
Aristaeomorpha foliacea	117.6	12
Aristaeomorpha foliacea	175	21.8
Aristaeomorpha foliacea	143.25	26.4
Aristaeomorpha foliacea	111.16	6.8
Aristaeomorpha foliacea	115.34	12.3
Aristaeomorpha foliacea	123.65	7.8
Aristaeomorpha foliacea	153.8	21.6
Aristaeomorpha foliacea	166.25	30
Aristaeomorpha foliacea	188	36.6
Aristaeomorpha foliacea	168	19.2
Aristaeomorpha foliacea	122.09	13.5
Aristaeomorpha foliacea	176.7	34.9
Aristaeomorpha foliacea	129.39	14
Aristaeomorpha foliacea	178	37.3
Aristaeomorpha foliacea	151	16.9
Aristaeomorpha foliacea	153	19.8
Aristaeomorpha foliacea	158.5	24
Aristaeomorpha foliacea	112.69	7.2
Aristaeomorpha foliacea	104.58	7.3
Aristaeomorpha foliacea	143.2	16.9
Aristaeomorpha foliacea	168	30.7
Aristaeomorpha foliacea	146.88	19.2
Aristaeomorpha foliacea	158	20
Aristaeomorpha foliacea	121.32	11.5
Aristaeomorpha foliacea	118.76	13
Aristaeomorpha foliacea	146	12.9
Aristaeomorpha foliacea	137.09	16.9
Aristaeomorpha foliacea	166	31.6
Aristaeomorpha foliacea	111.56	6.3
Aristaeomorpha foliacea	104.18	5.9
Aristaeomorpha foliacea	142.72	15.8
Aristaeomorpha foliacea	132.14	12
Aristaeomorpha foliacea	141.7	16.3
Aristaeomorpha foliacea	114.71	11
Aristaeomorpha foliacea	105.39	5.2
Aristaeomorpha foliacea	100.45	5.8
Aristaeomorpha foliacea	176.2	34.6
Aristaeomorpha foliacea	213	57.2
Aristaeomorpha foliacea	194	35.8
Aristaeomorpha foliacea	191	34.5
Aristaeomorpha foliacea	129.4	15.6
Aristaeomorpha foliacea	199	43.1
Aristaeomorpha foliacea	98.51	17.8
Aristaeomorpha foliacea	173	25.4
Aristaeomorpha foliacea	123.51	6.7
Aristaeomorpha foliacea	132.31	18.1
Aristaeomorpha foliacea	120.56	13.2
Aristaeomorpha foliacea	164.2	27.1
Aristaeomorpha foliacea	136.44	19.3
Aristaeomorpha foliacea	87.67	5.8
Aristaeomorpha foliacea	184.6	40.6
Aristaeomorpha foliacea	126.96	16
Aristaeomorpha foliacea	133.07	17.5
Aristaeomorpha foliacea	200	47.8
Aristaeomorpha foliacea	170.1	30.6
Aristaeomorpha foliacea	140.42	21
Aristaeomorpha foliacea	184	33.6
Aristaeomorpha foliacea	212	50.4
Aristaeomorpha foliacea	175	30.1
Aristaeomorpha foliacea	136.88	15.6
Aristaeomorpha foliacea	170	22.3
Aristaeomorpha foliacea	171	26.3
Aristaeomorpha foliacea	193.5	47.8
Aristaeomorpha foliacea	173.5	32.8
Aristaeomorpha foliacea	190	30.9
Aristaeomorpha foliacea	129.04	15.8
Aristaeomorpha foliacea	131.98	9.5
Aristaeomorpha foliacea	177	35.1
Aristaeomorpha foliacea	129.69	15
Aristaeomorpha foliacea	121.75	13.1
Aristaeomorpha foliacea	169.4	30.2
Aristaeomorpha foliacea	157.91	15
Aristaeomorpha foliacea	183	27.3
Aristaeomorpha foliacea	173	27.2
Aristaeomorpha foliacea	135.27	17
Aristaeomorpha foliacea	123.82	14.4
Aristaeomorpha foliacea	127.04	8.5
Aristaeomorpha foliacea	137.6	14.7
Aristaeomorpha foliacea	153	20.1
Aristaeomorpha foliacea	132.94	16
Aristaeomorpha foliacea	196.8	50.7
Aristaeomorpha foliacea	187	36.3
Aristaeomorpha foliacea	125.58	15.3
Aristaeomorpha foliacea	129.13	16.9
Aristaeomorpha foliacea	146.41	18.6
Aristaeomorpha foliacea	179	32.2
Aristaeomorpha foliacea	164	24.1
Aristaeomorpha foliacea	131.2	19.7
Aristaeomorpha foliacea	111	7
Aristaeomorpha foliacea	160.6	25.1
Aristaeomorpha foliacea	160.2	24.9
Aristaeomorpha foliacea	171	35.3
Aristaeomorpha foliacea	123.55	19.1
Aristaeomorpha foliacea	172	25
Aristaeomorpha foliacea	131.16	17.3
Aristaeomorpha foliacea	171.4	31.4
Aristaeomorpha foliacea	125.58	18.4
Aristaeomorpha foliacea	165.3	27.7
Aristaeomorpha foliacea	174	29.5
Aristaeomorpha foliacea	190	37.6
Aristaeomorpha foliacea	128.79	12.5
Aristaeomorpha foliacea	141.88	13.3
Aristaeomorpha foliacea	72.53	2
Aristaeomorpha foliacea	186	29.1
Aristaeomorpha foliacea	180	34.1
Aristaeomorpha foliacea	184	38
Aristaeomorpha foliacea	194	48.2
Aristaeomorpha foliacea	181.5	38.3
Aristaeomorpha foliacea	122.48	13.2
Aristaeomorpha foliacea	116.2	12.9
Aristaeomorpha foliacea	149.7	19.7
Aristaeomorpha foliacea	122.54	17.2
Aristaeomorpha foliacea	123.78	12.5
Aristaeomorpha foliacea	152.9	21.2
Aristaeomorpha foliacea	126.93	17.1
Aristaeomorpha foliacea	132.08	17.3
Aristaeomorpha foliacea	126.63	15.4
Aristaeomorpha foliacea	125.04	13.7
Aristaeomorpha foliacea	129.99	17.7
Aristaeomorpha foliacea	105	5.3
Aristaeomorpha foliacea	119.16	11.9
Aristaeomorpha foliacea	117.27	5.9
Aristaeomorpha foliacea	105.81	5.3
Aristaeomorpha foliacea	140.5	20.4
Aristaeomorpha foliacea	125.39	13.5
Aristaeomorpha foliacea	125.54	13.3
Aristaeomorpha foliacea	131.05	17.2
Aristaeomorpha foliacea	129.06	16.4
Aristaeomorpha foliacea	157	22.2
Aristaeomorpha foliacea	137.95	19.2
Aristaeomorpha foliacea	167	25.7
Aristaeomorpha foliacea	164	22.6
Aristaeomorpha foliacea	193	45.1
Aristaeomorpha foliacea	120.04	14.1
Aristaeomorpha foliacea	190	39.1
Aristaeomorpha foliacea	200	55.1
Aristaeomorpha foliacea	195	40.9
Aristaeomorpha foliacea	134.79	16.4
Aristaeomorpha foliacea	165	24.8
Aristaeomorpha foliacea	186	38.3
Aristaeomorpha foliacea	124.01	14.3
Aristaeomorpha foliacea	185	33.2
Aristaeomorpha foliacea	158	19.4
Aristaeomorpha foliacea	130	14.8
Aristaeomorpha foliacea	152.97	19.4
Aristaeomorpha foliacea	131.94	18.7
Aristaeomorpha foliacea	143.25	17.6
Aristaeomorpha foliacea	119.25	14.2
Aristaeomorpha foliacea	136.81	10.9
Aristaeomorpha foliacea	121.47	8.5
Aristaeomorpha foliacea	155	17.2
Aristaeomorpha foliacea	161	18
Aristaeomorpha foliacea	134.2	13.5
Aristaeomorpha foliacea	121.28	11.4
Aristaeomorpha foliacea	104.26	8.9
Aristaeomorpha foliacea	172	26.8
Aristaeomorpha foliacea	126.97	8.1
Aristaeomorpha foliacea	155	19.4
Aristaeomorpha foliacea	152.99	17
Aristaeomorpha foliacea	185	38
Aristaeomorpha foliacea	121.72	14.8
Aristaeomorpha foliacea	148.02	26.3
Aristaeomorpha foliacea	140.17	18
Aristaeomorpha foliacea	117.73	12
Aristaeomorpha foliacea	167	31.1
Aristaeomorpha foliacea	151.54	20.3
Aristaeomorpha foliacea	191	34.9
Aristaeomorpha foliacea	123.05	14
Aristaeomorpha foliacea	160	17.1
Aristaeomorpha foliacea	144.5	11.8
Aristaeomorpha foliacea	110.17	10.4
Aristaeomorpha foliacea	192	32.7
Aristaeomorpha foliacea	155	24.1
Aristaeomorpha foliacea	135.85	13.1
Aristaeomorpha foliacea	199	39.2
Aristaeomorpha foliacea	205	54.4
Aristaeomorpha foliacea	97.27	4.1
Aristaeomorpha foliacea	225	50.4
Aristaeomorpha foliacea	200	47.9
Aristaeomorpha foliacea	140.15	19.2
Aristaeomorpha foliacea	138.72	18.4
Aristaeomorpha foliacea	123	9.9
Aristaeomorpha foliacea	165	23.4
Aristaeomorpha foliacea	143	16.4
Aristaeomorpha foliacea	154	23.8
Aristaeomorpha foliacea	152.3	20.9
Aristaeomorpha foliacea	114.62	8.4
Aristaeomorpha foliacea	147.3	14.6
Aristaeomorpha foliacea	120.37	9.9
Aristaeomorpha foliacea	185	37.5
Aristaeomorpha foliacea	158	16.6
Aristaeomorpha foliacea	149	18.4
Aristaeomorpha foliacea	114.1	7.7
Aristaeomorpha foliacea	90.8	3.5
Aristaeomorpha foliacea	137.5	13.8
Aristaeomorpha foliacea	156	19.7
Aristaeomorpha foliacea	173	31.3
Aristaeomorpha foliacea	177	50.8
Aristaeomorpha foliacea	153.47	16.5
Aristaeomorpha foliacea	122.18	10.9
Aristaeomorpha foliacea	124.54	12.4
Aristaeomorpha foliacea	140.43	21.5
Aristaeomorpha foliacea	160	22.8
Aristaeomorpha foliacea	138.1	14.9
Aristaeomorpha foliacea	129.99	16.7
Aristaeomorpha foliacea	125.98	11.4
Aristaeomorpha foliacea	103.36	4.1
Aristaeomorpha foliacea	164	33.6
Aristaeomorpha foliacea	147.54	21.8
Aristaeomorpha foliacea	114.67	12.6
Aristaeomorpha foliacea	126.2	10.9
Aristaeomorpha foliacea	129.58	9.8
Aristaeomorpha foliacea	131.62	15.5
Aristaeomorpha foliacea	129.1	11.8
Aristaeomorpha foliacea	144.2	12.7
Aristaeomorpha foliacea	175.8	34.3
Aristaeomorpha foliacea	134.48	16
Aristaeomorpha foliacea	155.88	20
Aristaeomorpha foliacea	149.7	19.7
Aristaeomorpha foliacea	150.21	15.9
Aristaeomorpha foliacea	195	34
Aristaeomorpha foliacea	129.81	8.5
Aristaeomorpha foliacea	129.53	15.8
Aristaeomorpha foliacea	123.88	8.1
Aristaeomorpha foliacea	110.27	6.5
Aristaeomorpha foliacea	133.85	8.5
Aristaeomorpha foliacea	169	23.2
Aristaeomorpha foliacea	163	21.6
Aristaeomorpha foliacea	122.3	9.3
Aristaeomorpha foliacea	146.71	10.2
Aristaeomorpha foliacea	129.29	8
Aristaeomorpha foliacea	147.5	18.7
Aristaeomorpha foliacea	192	40.9
Aristaeomorpha foliacea	224	52.5
Aristaeomorpha foliacea	111.92	11.2
Aristaeomorpha foliacea	142.11	10.81
Aristaeomorpha foliacea	170	41.1
Aristaeomorpha foliacea	127.64	11.6
Aristaeomorpha foliacea	115.56	8.2
Aristaeomorpha foliacea	103.25	5.9
Aristaeomorpha foliacea	112.44	5.3
Aristaeomorpha foliacea	161	25.6
Aristaeomorpha foliacea	115.87	11.6
Aristaeomorpha foliacea	144.65	12.7
Aristaeomorpha foliacea	186	35.2
Aristaeomorpha foliacea	115	7.9
Aristaeomorpha foliacea	153.48	18.2
Aristaeomorpha foliacea	138.73	17.3
Aristaeomorpha foliacea	166.4	28.4
Aristaeomorpha foliacea	150.52	29.7
Aristaeomorpha foliacea	143.19	16.7
Aristaeomorpha foliacea	98.94	3.6
Aristaeomorpha foliacea	99.27	3.4
Aristaeomorpha foliacea	150.65	16
Aristaeomorpha foliacea	142.7	16.7
Aristaeomorpha foliacea	176	31.1
Aristaeomorpha foliacea	119.91	13.2
Aristaeomorpha foliacea	149.94	17.8
Aristaeomorpha foliacea	175	37
Aristaeomorpha foliacea	164	24.3
Aristaeomorpha foliacea	118.94	14.1
Aristaeomorpha foliacea	169.6	30.3
Aristaeomorpha foliacea	152.78	21.2
Aristaeomorpha foliacea	114.17	12.4
Aristaeomorpha foliacea	150.89	23.1
Aristaeomorpha foliacea	120.58	15.6
Aristaeomorpha foliacea	121.82	13.1
Aristaeomorpha foliacea	117.92	9.7
Aristaeomorpha foliacea	181	28.5
Aristaeomorpha foliacea	126.43	15.3
Aristaeomorpha foliacea	137	14.5
Aristaeomorpha foliacea	122.99	12.9
Aristaeomorpha foliacea	110.71	6.4
Aristaeomorpha foliacea	102.75	4.4
Aristaeomorpha foliacea	122.36	12.3
Aristaeomorpha foliacea	134.15	16.6
Aristaeomorpha foliacea	143.15	14.8
Aristaeomorpha foliacea	128.77	13.6
Aristaeomorpha foliacea	200	51.1
Aristaeomorpha foliacea	190	47
Aristaeomorpha foliacea	204	53.5
Aristaeomorpha foliacea	178	34.5
Aristaeomorpha foliacea	180	37
Aristaeomorpha foliacea	165.8	28
Aristaeomorpha foliacea	188	27.5
Aristaeomorpha foliacea	222	53.5
Aristaeomorpha foliacea	189	36.5
Aristaeomorpha foliacea	165	24
Aristaeomorpha foliacea	182	42
Aristaeomorpha foliacea	200	53
Aristaeomorpha foliacea	142	20
Aristaeomorpha foliacea	194.9	49
Aristaeomorpha foliacea	172	39
Aristaeomorpha foliacea	120.65	13
Aristaeomorpha foliacea	185	22.5
Aristaeomorpha foliacea	204	56
Aristaeomorpha foliacea	123.04	13
Aristaeomorpha foliacea	188	52
Aristaeomorpha foliacea	128.79	17.5
Aristaeomorpha foliacea	168.3	29.5
Aristaeomorpha foliacea	122.18	13
Aristaeomorpha foliacea	198	43
Aristaeomorpha foliacea	139.7	15.5
Aristaeomorpha foliacea	186.4	42
Aristaeomorpha foliacea	180.4	37.5
Aristaeomorpha foliacea	181.8	38.5
Aristaeomorpha foliacea	138.55	19
Aristaeomorpha foliacea	132.24	16
Aristaeomorpha foliacea	184	35
Aristaeomorpha foliacea	196	42
Aristaeomorpha foliacea	179	41
Aristaeomorpha foliacea	198	44
Aristaeomorpha foliacea	167	29
Aristaeomorpha foliacea	117.96	9.5
Aristaeomorpha foliacea	186	32
Aristaeomorpha foliacea	113.25	10
Aristaeomorpha foliacea	137.43	20
Aristaeomorpha foliacea	169	39
Aristaeomorpha foliacea	170	36
Aristaeomorpha foliacea	130.3	18
Aristaeomorpha foliacea	140.2	15.7
Aristaeomorpha foliacea	182	47
Aristaeomorpha foliacea	131.3	12.5
Aristaeomorpha foliacea	133.71	15.5
Aristaeomorpha foliacea	126.5	16
Aristaeomorpha foliacea	160.4	25
Aristaeomorpha foliacea	171.5	31.5
Aristaeomorpha foliacea	195	37.5
Aristaeomorpha foliacea	188	39.7
Aristaeomorpha foliacea	133.35	18.8
Aristaeomorpha foliacea	185	50.8
Aristaeomorpha foliacea	173	42.1
Aristaeomorpha foliacea	185	40.3
Aristaeomorpha foliacea	149	27.9
Aristaeomorpha foliacea	178	40.5
Aristaeomorpha foliacea	190	41.1
Aristaeomorpha foliacea	202	49.4
Aristaeomorpha foliacea	143.23	24.3
Aristaeomorpha foliacea	139.2	15.3
Aristaeomorpha foliacea	144.48	21.2
Aristaeomorpha foliacea	190	50.8
Aristaeomorpha foliacea	140.5	15.8
Aristaeomorpha foliacea	130	21
Aristaeomorpha foliacea	198.7	52.4
Aristaeomorpha foliacea	133	20.1
Aristaeomorpha foliacea	196	40.4
Aristaeomorpha foliacea	129	16.9
Aristaeomorpha foliacea	126.74	14.6
Aristaeomorpha foliacea	178	30.6
Aristaeomorpha foliacea	138.52	21.1
Aristaeomorpha foliacea	175.6	34.2
Aristaeomorpha foliacea	128	15.6
Aristaeomorpha foliacea	190	53
Aristaeomorpha foliacea	202.6	56
Aristaeomorpha foliacea	193	42.5
Aristaeomorpha foliacea	178	37.5
Aristaeomorpha foliacea	176.8	35
Aristaeomorpha foliacea	188	46.5
Aristaeomorpha foliacea	183.1	39.5
Aristaeomorpha foliacea	197	43.5
Aristaeomorpha foliacea	192	42
Aristaeomorpha foliacea	125.84	10.5
Aristaeomorpha foliacea	172.3	32
Aristaeomorpha foliacea	179.7	37
Aristaeomorpha foliacea	190.2	45
Aristaeomorpha foliacea	191.4	46
Aristaeomorpha foliacea	195	39
Aristaeomorpha foliacea	137.44	16.5
Aristaeomorpha foliacea	142.77	21.8
Aristaeomorpha foliacea	138.17	19.4
Aristaeomorpha foliacea	129.01	17.5
Aristaeomorpha foliacea	169.6	30.5
Aristaeomorpha foliacea	133.08	16.3
Aristaeomorpha foliacea	190.8	45.5
Aristaeomorpha foliacea	125.32	15.8
Aristaeomorpha foliacea	117.6	11.8
Aristaeomorpha foliacea	123.26	14.1
Aristaeomorpha foliacea	132.17	17
Aristaeomorpha foliacea	131.24	10.3
Aristaeomorpha foliacea	129.97	6.9
Aristaeomorpha foliacea	125.28	6.9
Aristaeomorpha foliacea	126.19	8.1
Aristaeomorpha foliacea	145.2	13
Aristaeomorpha foliacea	117.63	5.2
Aristaeomorpha foliacea	179	29.6
Aristaeomorpha foliacea	167	15.3
Aristaeomorpha foliacea	134.5	13.6
Aristaeomorpha foliacea	157	14.2
Aristaeomorpha foliacea	184	24.8
Aristaeomorpha foliacea	195	37.3
Aristaeomorpha foliacea	186	29.1
Aristaeomorpha foliacea	142.5	16.6
Aristaeomorpha foliacea	143.17	12.3
Aristaeomorpha foliacea	139.06	9.6
Aristaeomorpha foliacea	145.79	10.7
Aristaeomorpha foliacea	152.51	16.7
Aristaeomorpha foliacea	153.47	15.5
Aristaeomorpha foliacea	144.84	15
Aristaeomorpha foliacea	133.8	8.2
Aristaeomorpha foliacea	163	16.9
Aristaeomorpha foliacea	131.5	7.5
Aristaeomorpha foliacea	117	8.4
Aristaeomorpha foliacea	126.82	9.5
Aristaeomorpha foliacea	143.77	11.9
Aristaeomorpha foliacea	104.59	3.8
Aristaeomorpha foliacea	117.31	5
Aristaeomorpha foliacea	110.28	4.1
Aristaeomorpha foliacea	129.37	6.8
Aristaeomorpha foliacea	105.46	3.6
Aristaeomorpha foliacea	118.93	5.2
Aristaeomorpha foliacea	105.65	5.2
Aristaeomorpha foliacea	90.52	3.5
Aristaeomorpha foliacea	115	7.9
Aristaeomorpha foliacea	112.4	7.3
Aristaeomorpha foliacea	114.16	3.9
Aristaeomorpha foliacea	109.33	4.5
Aristaeomorpha foliacea	122.39	5.8
Aristaeomorpha foliacea	111	7
Aristaeomorpha foliacea	136.86	11.5
Aristaeomorpha foliacea	147	18.5
Aristaeomorpha foliacea	113	12.8
Aristaeomorpha foliacea	161	28.1
Aristaeomorpha foliacea	146.6	18.3
Aristaeomorpha foliacea	162	24.4
Aristaeomorpha foliacea	186.9	42.4
Aristaeomorpha foliacea	178	32.4
Aristaeomorpha foliacea	139.7	15.5
Aristaeomorpha foliacea	136	19.5
Aristaeomorpha foliacea	188	39.8
Aristaeomorpha foliacea	165.9	28.1
Aristaeomorpha foliacea	125	16
Aristaeomorpha foliacea	132	17.2
Aristaeomorpha foliacea	147.5	18.7
Aristaeomorpha foliacea	178.6	36.2
Aristaeomorpha foliacea	127.8	11.4
Aristaeomorpha foliacea	176.4	34.7
Aristaeomorpha foliacea	116	13.4
Aristaeomorpha foliacea	203	46.4
Aristaeomorpha foliacea	118	14.4
Aristaeomorpha foliacea	138.2	19.5
Aristaeomorpha foliacea	158.3	23.9
Aristaeomorpha foliacea	188.2	43.4
Aristaeomorpha foliacea	176	29.5
Aristaeomorpha foliacea	131	12.4
Aristaeomorpha foliacea	177	33.8
Aristaeomorpha foliacea	170.9	31.1
Aristaeomorpha foliacea	167.3	28.9
Aristaeomorpha foliacea	178	34.1
Aristaeomorpha foliacea	194.2	48.4
Aristaeomorpha foliacea	160.6	25.1
Aristaeomorpha foliacea	184.3	40.4
Aristaeomorpha foliacea	98.3	4.6
Aristaeomorpha foliacea	137.6	14.7
Aristaeomorpha foliacea	122	17.3
Aristaeomorpha foliacea	187.9	43.2
Aristaeomorpha foliacea	183.9	40.1
Aristaeomorpha foliacea	117.21	11.1
Aristaeomorpha foliacea	189.4	44.4
Aristaeomorpha foliacea	187	44.3
Aristaeomorpha foliacea	131.9	19.5
Aristaeomorpha foliacea	170.6	30.9
Aristaeomorpha foliacea	150	16.4
Aristaeomorpha foliacea	122	14
Aristaeomorpha foliacea	147	18.5
Aristaeomorpha foliacea	195	43.8
Aristaeomorpha foliacea	129	17.4
Aristaeomorpha foliacea	132	17.9
Aristaeomorpha foliacea	126.8	13.5
Aristaeomorpha foliacea	147.9	18.9
Aristaeomorpha foliacea	192.9	47.3
Aristaeomorpha foliacea	160	24.6
Aristaeomorpha foliacea	138	14.7
Aristaeomorpha foliacea	135	18.1
Aristaeomorpha foliacea	117.52	12.4
Aristaeomorpha foliacea	121.9	12.13
Aristaeomorpha foliacea	181	38.1
Aristaeomorpha foliacea	166	27.9
Aristaeomorpha foliacea	112.57	11
Aristaeomorpha foliacea	160	26.8
Aristaeomorpha foliacea	173	32.7
Aristaeomorpha foliacea	141	16.1
Aristaeomorpha foliacea	130	13.5
Aristaeomorpha foliacea	174	33.1
Aristaeomorpha foliacea	136	14
Aristaeomorpha foliacea	164	26.9
Aristaeomorpha foliacea	144	17.1
Aristaeomorpha foliacea	172	31.7
Aristaeomorpha foliacea	157	23.1
Aristaeomorpha foliacea	113.97	7.5
Aristaeomorpha foliacea	154	21.6
Aristaeomorpha foliacea	141	16.2
Aristaeomorpha foliacea	151	20.4
Aristaeomorpha foliacea	130.6	11.6
Aristaeomorpha foliacea	150	15.2
Aristaeomorpha foliacea	123	10.1
Aristaeomorpha foliacea	180	32.3
Aristaeomorpha foliacea	182	36.9
Aristaeomorpha foliacea	182	35.9
Aristaeomorpha foliacea	195	42.2
Aristaeomorpha foliacea	139.18	15.4
Aristaeomorpha foliacea	173	32.2
Aristaeomorpha foliacea	177	35.1
Aristaeomorpha foliacea	178	35.6
Aristaeomorpha foliacea	132.11	9.1
Aristaeomorpha foliacea	161	25.4
Aristaeomorpha foliacea	125	10.7
Aristaeomorpha foliacea	157	16.8
Aristaeomorpha foliacea	154	21.9
Aristaeomorpha foliacea	165	23.5
Aristaeomorpha foliacea	168	29.6
Aristaeomorpha foliacea	116	8.1
Aristaeomorpha foliacea	128.72	9.1
Aristaeomorpha foliacea	145	17.7
Aristaeomorpha foliacea	96.69	28.6
Aristaeomorpha foliacea	121	9.5
Aristaeomorpha foliacea	154	21.7
Aristaeomorpha foliacea	128	11.5
Aristaeomorpha foliacea	129	11.8
Aristaeomorpha foliacea	119.1	5.5
Aristaeomorpha foliacea	143	18.4
Aristaeomorpha foliacea	161	25.5
Aristaeomorpha foliacea	164	23.5
Aristaeomorpha foliacea	184	34.8
Aristaeomorpha foliacea	128	8.9
Aristaeomorpha foliacea	131	12.5
Aristaeomorpha foliacea	160	20.4
Aristaeomorpha foliacea	162	23.4
Aristaeomorpha foliacea	107.18	6.8
Aristaeomorpha foliacea	143	15.2
Aristaeomorpha foliacea	169	26.1
Aristaeomorpha foliacea	124.73	14.9
Aristaeomorpha foliacea	200	53.6
Aristaeomorpha foliacea	185	41.3
Aristaeomorpha foliacea	189	36.4
Aristaeomorpha foliacea	139	15.4
Aristaeomorpha foliacea	172	28.4
Aristaeomorpha foliacea	145	17.8
Aristaeomorpha foliacea	137.17	18.4
Aristaeomorpha foliacea	158	23.8
Aristaeomorpha foliacea	192	41.6
Aristaeomorpha foliacea	141	16
Aristaeomorpha foliacea	183	39.1
Aristaeomorpha foliacea	127	11.1
Aristaeomorpha foliacea	120	9.2
Aristaeomorpha foliacea	178	26.2
Aristaeomorpha foliacea	181	37.6
Aristaeomorpha foliacea	192	41.8
Aristaeomorpha foliacea	164	27
Aristaeomorpha foliacea	129	11.9
Aristaeomorpha foliacea	181	38.2
Aristaeomorpha foliacea	161	25.1
Aristaeomorpha foliacea	131.36	9
Aristaeomorpha foliacea	119.99	15.6
Aristaeomorpha foliacea	139	15.2
Aristaeomorpha foliacea	143	16.9
Aristaeomorpha foliacea	165	31.7
Aristaeomorpha foliacea	167	28.6
Aristaeomorpha foliacea	111	7.1
Aristaeomorpha foliacea	138	13.8
Aristaeomorpha foliacea	134	15.8
Aristaeomorpha foliacea	108	6.3
Aristaeomorpha foliacea	201	54.4
Aristaeomorpha foliacea	187	41.4
Aristaeomorpha foliacea	142	16.3
Aristaeomorpha foliacea	202	55.9
Aristaeomorpha foliacea	125	5.6
Aristaeomorpha foliacea	167	30.4
Aristaeomorpha foliacea	147	18.3
Aristaeomorpha foliacea	188	43.4
Aristaeomorpha foliacea	158	23.7
Aristaeomorpha foliacea	170	27.7
Aristaeomorpha foliacea	125.44	15.6
Aristaeomorpha foliacea	92	3.6
Aristaeomorpha foliacea	173	32.6
Aristaeomorpha foliacea	186	36.6
Aristaeomorpha foliacea	183	39.2
Aristaeomorpha foliacea	139	15.3
Aristaeomorpha foliacea	140.39	20.9
Aristaeomorpha foliacea	200	47.6
Aristaeomorpha foliacea	190	34.4
Aristaeomorpha foliacea	183	34.7
Aristaeomorpha foliacea	165	27.6
Aristaeomorpha foliacea	165	23.4
Aristaeomorpha foliacea	194	39.2
Aristaeomorpha foliacea	170	27.5
Aristaeomorpha foliacea	122	15.7
Aristaeomorpha foliacea	175	30.7
Aristaeomorpha foliacea	174	33
Aristaeomorpha foliacea	151	20.5
Aristaeomorpha foliacea	129.1	13.3
Aristaeomorpha foliacea	187	42.2
Aristaeomorpha foliacea	191	33.4
Aristaeomorpha foliacea	174	27.8
Aristaeomorpha foliacea	154	20.8
Aristaeomorpha foliacea	143	16.8
Aristaeomorpha foliacea	186	38.8
Aristaeomorpha foliacea	186	41.7
Aristaeomorpha foliacea	134	13.3
Aristaeomorpha foliacea	168	25.8
Aristaeomorpha foliacea	168	29.1
Aristaeomorpha foliacea	140	15.6
Aristaeomorpha foliacea	145	17.6
Aristaeomorpha foliacea	144	17.2
Aristaeomorpha foliacea	200	45.4
Aristaeomorpha foliacea	203	45.8
Aristaeomorpha foliacea	201	37.9
Aristaeomorpha foliacea	151	20.2
Aristaeomorpha foliacea	122.6	13.5
Aristaeomorpha foliacea	115.43	10.9
Aristaeomorpha foliacea	130.36	13.4
Aristaeomorpha foliacea	135.2	16.2
Aristaeomorpha foliacea	133	13.1
Aristaeomorpha foliacea	133.1	16.9
Aristaeomorpha foliacea	174	32.2
Aristaeomorpha foliacea	131.2	14.6
Aristaeomorpha foliacea	128	17.8
Aristaeomorpha foliacea	205	52.4
Aristaeomorpha foliacea	131.1	15.3
Aristaeomorpha foliacea	187	42.2
Aristaeomorpha foliacea	139	32.5
Aristaeomorpha foliacea	120.69	13.3
Aristaeomorpha foliacea	170	27.8
Aristaeomorpha foliacea	188	43.2
Aristaeomorpha foliacea	122.5	13.2
Aristaeomorpha foliacea	114.93	12.1
Aristaeomorpha foliacea	123.7	11.1
Aristaeomorpha foliacea	129.62	14.4
Aristaeomorpha foliacea	116.18	10.4
Aristaeomorpha foliacea	170	25
Aristaeomorpha foliacea	185	41.3
Aristaeomorpha foliacea	200	48.5
Aristaeomorpha foliacea	140	15.8
Aristaeomorpha foliacea	192	35.5
Aristaeomorpha foliacea	154	20.9
Aristaeomorpha foliacea	189	40.2
Aristaeomorpha foliacea	195	49
Aristaeomorpha foliacea	109.23	11
Aristaeomorpha foliacea	129.48	13.6
Aristaeomorpha foliacea	177	35.3
Aristaeomorpha foliacea	174	33.4
Aristaeomorpha foliacea	124.7	12.1
Aristaeomorpha foliacea	123.35	16.7
Aristaeomorpha foliacea	190	41.9
Aristaeomorpha foliacea	130.47	14.7
Aristaeomorpha foliacea	188	43.6
Aristaeomorpha foliacea	136.5	17
Aristaeomorpha foliacea	136.52	16.8
Aristaeomorpha foliacea	132.6	16.3
Aristaeomorpha foliacea	126.92	18
Aristaeomorpha foliacea	168	29.5
Aristaeomorpha foliacea	118.31	10.8
Aristaeomorpha foliacea	171	37.2
Aristaeomorpha foliacea	169	30.2
Aristaeomorpha foliacea	170	30.4
Aristaeomorpha foliacea	151	16.1
Aristaeomorpha foliacea	172	29.4
Aristaeomorpha foliacea	152	20.8
Aristaeomorpha foliacea	200	51.9
Aristaeomorpha foliacea	173	32.6
Aristaeomorpha foliacea	127	8.7
Aristaeomorpha foliacea	178	35.6
Aristaeomorpha foliacea	177	35.1
Aristaeomorpha foliacea	188	42.4
Aristaeomorpha foliacea	157	23.2
Aristaeomorpha foliacea	176	33.1
Aristaeomorpha foliacea	177	33.1
Aristaeomorpha foliacea	178	36.3
Aristaeomorpha foliacea	197	23.6
Aristaeomorpha foliacea	180	23.261
Aristaeomorpha foliacea	210	33.314
Aristaeomorpha foliacea	203	34.182
Aristaeomorpha foliacea	183	23.899
Aristaeomorpha foliacea	217	43.504
Aristaeomorpha foliacea	175.773	27.7
Aristaeomorpha foliacea	191	25.193
Aristaeomorpha foliacea	145	13.316
Aristaeomorpha foliacea	146	9.681
Aristaeomorpha foliacea	166.63	22.736
Aristaeomorpha foliacea	181	23.462
Aristaeomorpha foliacea	202	30.19
Aristaeomorpha foliacea	186	19.895
Aristaeomorpha foliacea	204	34.441
Aristaeomorpha foliacea	184	24.329
Aristaeomorpha foliacea	186	22.684
Aristaeomorpha foliacea	146	9.664
Aristaeomorpha foliacea	129.703	9.005
Aristaeomorpha foliacea	145	11.745
Aristaeomorpha foliacea	144	7.714
Aristaeomorpha foliacea	120	4.146
Aristaeomorpha foliacea	132	5.94
Aristaeomorpha foliacea	205	34.305
Aristaeomorpha foliacea	178.738	29.467
Aristaeomorpha foliacea	173.315	26.295
Aristaeomorpha foliacea	187	27.137
Aristaeomorpha foliacea	174	22.575
Aristaeomorpha foliacea	163.45	21.173
Aristaeomorpha foliacea	165	14.86
Aristaeomorpha foliacea	145.126	13.642
Aristaeomorpha foliacea	178	25.182
Aristaeomorpha foliacea	170	27.867
Aristaeomorpha foliacea	182	37.45
Aristaeomorpha foliacea	127	12
Aristaeomorpha foliacea	108	8.358
Aristaeomorpha foliacea	83	4.64
Aristaeomorpha foliacea	117	3.294
Aristaeomorpha foliacea	162.92	20.92
Aristaeomorpha foliacea	122	13.428
Aristaeomorpha foliacea	180	31.474
Aristaeomorpha foliacea	187	36.652
Aristaeomorpha foliacea	137	18.149
Aristaeomorpha foliacea	161.657	20.327
Aristaeomorpha foliacea	157	18.72
Aristaeomorpha foliacea	149	14.675
Aristaeomorpha foliacea	182	33.33
Aristaeomorpha foliacea	175	36.576
Aristaeomorpha foliacea	123	20.74
Aristaeomorpha foliacea	145	23.667
Aristaeomorpha foliacea	124	20.634
Aristaeomorpha foliacea	157.277	18.364
Aristaeomorpha foliacea	129	17.465
Aristaeomorpha foliacea	120	20.346
Aristaeomorpha foliacea	122	19.05
Aristaeomorpha foliacea	156.716	18.123
Aristaeomorpha foliacea	195	39.1938
Aristaeomorpha foliacea	178	33.4257
Aristaeomorpha foliacea	174.816	27.1464
Babamunida forceps	53.22	6.4
Babamunida forceps	35.39	1.8
Babamunida forceps	47.71	3.6
Babamunida forceps	45.05	2.5
Babamunida forceps	65.17	8.2
Babamunida forceps	50.45	2.9
Babamunida forceps	58	5.8
Babamunida forceps	58.07	7.6
Babamunida forceps	51.2	2
Babamunida forceps	65.43	7.6
Babamunida forceps	36.85	1.3
Babamunida forceps	67.34	10.5
Babamunida forceps	56.18	6
Babamunida forceps	46.08	3.9
Babamunida forceps	53.61	7
Babamunida forceps	50.38	3.8
Babamunida forceps	65.76	7.8
Babamunida forceps	60.18	6.6
Eunephrops bairdii	170	97
Eunephrops bairdii	133.2	35
Eunephrops bairdii	148.89	53.8
Eunephrops bairdii	135.83	38.6
Eunephrops bairdii	107.12	16.5
Eunephrops bairdii	220	218.1
Eunephrops bairdii	148	56.9
Eunephrops bairdii	118.35	26.1
Eunephrops bairdii	82.3	7.9
Eunephrops bairdii	104.25	14.2
Eunephrops bairdii	107.94	14.8
Eunephrops bairdii	79.94	8
Eunephrops bairdii	98.12	15.9
Eunephrops bairdii	152.4	55.5
Eunephrops bairdii	132.55	32.9
Eunephrops bairdii	62.3	3
Eunephrops bairdii	91.11	11.8
Eunephrops bairdii	75.3	5.9
Eunephrops bairdii	68.53	2.8
Eunephrops bairdii	140.4	50.2
Eunephrops bairdii	122.85	29.7
Eunephrops bairdii	148.8	39.3
Eunephrops bairdii	180	79.5
Eunephrops bairdii	203	180.7
Eunephrops bairdii	58.32	1.5
Eunephrops bairdii	135.61	40.4
Eunephrops bairdii	136.17	42.9
Eunephrops bairdii	143.02	47.9
Eunephrops bairdii	138.29	47.2
Eunephrops bairdii	131.01	45.5
Eunephrops bairdii	149.06	60.6
Eunephrops bairdii	120.02	27.5
Eunephrops bairdii	84.6	7.4
Eunephrops bairdii	127.45	33.4
Eunephrops bairdii	106.86	17.1
Eunephrops bairdii	82.92	7.9
Eunephrops bairdii	129.2	28.5
Eunephrops bairdii	120	23
Eunephrops bairdii	96.9	11.8
Eunephrops bairdii	110	17.1
Eunephrops bairdii	73.7	4.6
Eunephrops bairdii	196	107.7
Eunephrops bairdii	176	85.9
Eunephrops bairdii	126	25
Eunephrops bairdii	113.7	18.3
Eunephrops bairdii	124	26.8
Eunephrops bairdii	135.7	28.2
Eunephrops bairdii	130.9	33
Eunephrops bairdii	116.8	22.3
Eunephrops bairdii	89.3	8.9
Eunephrops bairdii	80.7	5.9
Eunephrops bairdii	117	17.2
Eunephrops bairdii	122	26.9
Eunephrops bairdii	151	47.6
Eunephrops bairdii	116	21.8
Eunephrops bairdii	119	22.7
Eunephrops bairdii	96	9.2
Eunephrops bairdii	105.6	15.8
Eunephrops bairdii	68	4.4
Eunephrops bairdii	67	3.8
Eunephrops bairdii	97.03	13.1
Eunephrops bairdii	121	32
Eunephrops bairdii	158	61.9
Eunephrops bairdii	119.6	24.2
Eunephrops bairdii	132.89	32
Eunephrops bairdii	176	97
Eunephrops bairdii	168.67	36.1
Eunephrops bairdii	112	24.5
Eunephrops bairdii	128	41.1
Eunephrops bairdii	142.13	30.8
Eunephrops bairdii	114	27.1
Eunephrops bairdii	112.77	23.6
Eunephrops bairdii	111	20.4
Eunephrops bairdii	107.12	19.6
Eunephrops bairdii	100.2	13.2
Eunephrops bairdii	91	11.8
Eunephrops bairdii	118.37	14.5
Eunephrops bairdii	82	9.4
Eunephrops bairdii	132.6	34.5
Eunephrops bairdii	111	23.1
Eunephrops bairdii	165.9	74.2
Eunephrops bairdii	215.1	180.6
Eunephrops bairdii	152.5	64.6
Eunephrops bairdii	112.5	22.6
Eunephrops bairdii	53.12	1.8
Eunephrops bairdii	179	128.8
Eunephrops bairdii	157	80.7
Eunephrops bairdii	166	74.4
Eunephrops bairdii	126	25.793
Eunephrops bairdii	87	6.648
Eunephrops bairdii	171	50.091
Eunephrops bairdii	170	82.65
Eunephrops bairdii	161	49.726
Eunephrops bairdii	183	70.934
Eunephrops bairdii	133	31.975
Eunephrops bairdii	113	21.622
Eunephrops bairdii	111	17.751
Eunephrops bairdii	144	37.142
Eunephrops bairdii	160	46.186
Eunephrops bairdii	110	15.898
Eunephrops bairdii	193	120.425
Eunephrops bairdii	118	16.0797
Eunephrops bairdii	160	64.8841
Eunephrops bairdii	134	31.11
Eunephrops bairdii	116	23.8865
Eunephrops bairdii	149	52.9663
Eunephrops bairdii	158	60.8676
Garymunida longipes	46.2	3.5
Garymunida longipes	44.21	4.6
Garymunida longipes	49.58	5
Garymunida longipes	43.25	2.9
Garymunida longipes	51	5.8
Garymunida longipes	50.89	2.9
Garymunida longipes	52.73	3.5
Garymunida longipes	52	6.7
Garymunida longipes	42.57	3
Garymunida longipes	49.17	2.4
Garymunida longipes	42.35	3.4
Garymunida longipes	42.94	3.3
Garymunida longipes	41.33	2.4
Garymunida longipes	40.88	2.9
Garymunida longipes	33	1
Garymunida longipes	44.98	3.1
Garymunida longipes	48.56	5.6
Garymunida longipes	50.87	2.3
Garymunida longipes	48.41	5.8
Garymunida longipes	40.57	3
Garymunida longipes	40.79	3
Garymunida longipes	46.23	3.1
Garymunida longipes	50.87	5.8
Garymunida longipes	49.51	4.3
Garymunida longipes	54.59	5.3
Garymunida longipes	53.84	6.8
Garymunida longipes	46	4.8
Garymunida longipes	43.81	2.9
Garymunida longipes	47.8	3.9
Garymunida longipes	50.3	4.5
Garymunida longipes	52.16	4.7
Garymunida longipes	51.25	5.3
Garymunida longipes	52.51	5.3
Garymunida longipes	37.57	1.7
Garymunida longipes	42.16	3.3
Garymunida longipes	52.32	5.1
Garymunida longipes	49.13	4.1
Garymunida longipes	44.31	2.9
Garymunida longipes	48.77	5.2
Garymunida longipes	47.03	3.1
Garymunida longipes	47.6	5.4
Garymunida longipes	45.99	3.4
Garymunida longipes	51.66	4.4
Garymunida longipes	48.01	4.9
Garymunida longipes	50.76	3.9
Garymunida longipes	38.75	3.5
Garymunida longipes	39.71	3.9
Garymunida longipes	42.71	4.8
Garymunida longipes	45.52	4.4
Garymunida longipes	38.89	3.5
Garymunida longipes	41.69	3.5
Garymunida longipes	39.88	3.6
Garymunida longipes	39.58	3.8
Garymunida longipes	42.05	3.5
Garymunida longipes	47.14	4.1
Garymunida longipes	42.72	3.9
Garymunida longipes	44.83	6.1
Garymunida longipes	49.77	6.9
Garymunida longipes	46.23	5
Garymunida longipes	42.72	3.8
Garymunida longipes	46.03	3.6
Garymunida longipes	46.79	4.7
Garymunida longipes	49.48	7.4
Garymunida longipes	40.28	4
Garymunida longipes	46.04	5.6
Garymunida longipes	40.96	3.3
Garymunida longipes	46.91	5.5
Garymunida longipes	46.19	3.8
Garymunida longipes	42.12	3.5
Garymunida longipes	39.54	2.8
Garymunida longipes	42.76	3.6
Garymunida longipes	44.83	5.8
Garymunida longipes	35.93	2.7
Garymunida longipes	43.77	3.5
Garymunida longipes	45.51	3.5
Garymunida longipes	44.85	5.2
Garymunida longipes	41.6	3.1
Garymunida longipes	44.6	4.8
Garymunida longipes	25.95	0.8
Garymunida longipes	47.86	3.4
Garymunida longipes	51.07	6.1
Garymunida longipes	44.87	4.2
Garymunida longipes	48.69	4.1
Garymunida longipes	35.38	1.6
Garymunida longipes	37.82	2.5
Garymunida longipes	41.35	4
Garymunida longipes	41.63	3.5
Garymunida longipes	41.68	1.8
Garymunida longipes	42.86	3.5
Garymunida longipes	41.78	3
Garymunida longipes	43.88	4
Garymunida longipes	48.49	4.1
Garymunida longipes	46.77	4
Garymunida longipes	49.7	6.4
Garymunida longipes	38.9	2.5
Garymunida longipes	44.7	5.7
Garymunida longipes	34.55	2.2
Garymunida longipes	36.6	2.2
Garymunida longipes	40.86	3.1
Garymunida longipes	38.07	3.1
Garymunida longipes	42.92	4.1
Garymunida longipes	21.17	0.4
Garymunida longipes	46.87	5
Garymunida longipes	54.16	6.6
Garymunida longipes	47.61	6
Garymunida longipes	50.98	5.9
Garymunida longipes	45.55	5
Garymunida longipes	43.61	3.3
Garymunida longipes	50.25	5.4
Garymunida longipes	46.09	5
Garymunida longipes	46.85	3.8
Garymunida longipes	47.85	4.1
Garymunida longipes	44.07	5.2
Garymunida longipes	47.15	4.4
Garymunida longipes	49.94	5.3
Garymunida longipes	49.62	5.9
Garymunida longipes	39.91	2.5
Garymunida longipes	52.12	5.6
Garymunida longipes	52.79	5.6
Garymunida longipes	49.35	6.2
Garymunida longipes	50.84	6.3
Garymunida longipes	46.08	5.6
Garymunida longipes	46.34	4
Garymunida longipes	45.01	5.2
Garymunida longipes	50.45	6.1
Garymunida longipes	51.66	6.4
Garymunida longipes	39.27	3.1
Garymunida longipes	40.07	3.8
Garymunida longipes	49.1	7
Garymunida longipes	46.91	5.3
Garymunida longipes	32.8	2.1
Garymunida longipes	48.71	4.5
Garymunida longipes	46.18	5.1
Garymunida longipes	54.86	7.8
Garymunida longipes	47.49	5.9
Garymunida longipes	46.45	5.1
Garymunida longipes	54.25	5.8
Garymunida longipes	42.98	3.1
Garymunida longipes	44.91	4
Garymunida longipes	51.11	5
Garymunida longipes	36.11	1.5
Garymunida longipes	44.88	4.5
Garymunida longipes	45.3	5
Garymunida longipes	52.2	6.5
Garymunida longipes	34.6	1.9
Garymunida longipes	48.48	3.6
Garymunida longipes	49.05	4
Garymunida longipes	43.71	4
Garymunida longipes	34.63	2.4
Garymunida longipes	45.29	5.3
Garymunida longipes	47.03	5.7
Garymunida longipes	43.49	4.6
Garymunida longipes	42.45	2.9
Garymunida longipes	45.16	4.1
Garymunida longipes	47.2	5.5
Garymunida longipes	44.45	5.6
Garymunida longipes	45.46	5.3
Garymunida longipes	34.71	2.3
Garymunida longipes	63.24	5
Garymunida longipes	50.45	5.9
Garymunida longipes	40.82	3.4
Garymunida longipes	43.38	5.1
Garymunida longipes	52.01	7.5
Garymunida longipes	47.55	5.2
Garymunida longipes	46.39	4.8
Garymunida longipes	28.21	0.8
Garymunida longipes	48.53	4
Garymunida longipes	47.47	6.1
Garymunida longipes	42.67	4.4
Garymunida longipes	53.4	5.8
Garymunida longipes	41.86	4.4
Garymunida longipes	48.63	6.8
Garymunida longipes	38.37	3.8
Garymunida longipes	38.66	3
Garymunida longipes	46.03	4.8
Garymunida longipes	44.81	4.7
Garymunida longipes	48.4	5.6
Garymunida longipes	48.86	6.8
Garymunida longipes	46.04	4.2
Garymunida longipes	44.08	5.1
Garymunida longipes	42.7	4
Garymunida longipes	47.81	6.2
Garymunida longipes	33.19	1.8
Garymunida longipes	49.63	6.2
Garymunida longipes	45.22	5.6
Garymunida longipes	40.84	3.4
Garymunida longipes	39.14	4.1
Garymunida longipes	47.05	5.8
Garymunida longipes	50.17	6.8
Garymunida longipes	39.93	3.5
Garymunida longipes	53.19	7.2
Garymunida longipes	42.47	4.5
Garymunida longipes	41.91	4.2
Garymunida longipes	44.74	4.5
Garymunida longipes	53.05	5.5
Garymunida longipes	42.31	4.5
Garymunida longipes	34.04	1.8
Garymunida longipes	37.92	1.8
Garymunida longipes	50.47	5.3
Garymunida longipes	44.8	4.8
Garymunida longipes	44.09	3.8
Garymunida longipes	45.85	4.6
Garymunida longipes	53.38	6.1
Garymunida longipes	48.19	6.3
Garymunida longipes	49.81	8
Garymunida longipes	48.01	4.8
Garymunida longipes	47.59	6.3
Garymunida longipes	47.92	5.5
Garymunida longipes	43.98	5.5
Garymunida longipes	43.52	3.8
Garymunida longipes	37.72	2.9
Garymunida longipes	44.8	5.1
Garymunida longipes	47.2	3.6
Garymunida longipes	51.33	6.8
Garymunida longipes	48.14	4.5
Garymunida longipes	42.12	2.9
Garymunida longipes	39.19	3.9
Garymunida longipes	42.78	5.2
Garymunida longipes	47.67	5.3
Garymunida longipes	45.5	5.7
Garymunida longipes	46.24	5.9
Garymunida longipes	51.52	6.3
Garymunida longipes	36.54	2.1
Garymunida longipes	52.6	5.6
Garymunida longipes	51.63	6.1
Garymunida longipes	45.82	4.2
Garymunida longipes	41.11	4
Garymunida longipes	44.26	3.3
Garymunida longipes	49.56	5.6
Garymunida longipes	47.26	5
Garymunida longipes	45.11	4
Garymunida longipes	46.18	4
Garymunida longipes	47.54	5
Garymunida longipes	48.35	5.9
Garymunida longipes	44.87	4.2
Garymunida longipes	45.27	4.1
Garymunida longipes	50.98	5
Garymunida longipes	49.11	4.2
Garymunida longipes	46	5.3
Garymunida longipes	45.12	5.1
Garymunida longipes	38.78	3.1
Garymunida longipes	44.06	5.1
Garymunida longipes	41.04	3.6
Garymunida longipes	25.34	0.6
Garymunida longipes	43.1	4.1
Garymunida longipes	44.09	2.2
Garymunida longipes	46.53	4.7
Garymunida longipes	48.22	4.4
Garymunida longipes	46.56	2.8
Garymunida longipes	47.58	4.1
Garymunida longipes	33.48	1.7
Garymunida longipes	48.9	5.2
Garymunida longipes	43.72	4
Garymunida longipes	43.12	3.9
Garymunida longipes	37.15	2.7
Garymunida longipes	37.36	3.5
Garymunida longipes	42.7	3.4
Garymunida longipes	46.3	5.8
Garymunida longipes	40.38	3.1
Garymunida longipes	39.42	3.4
Garymunida longipes	44.5	5.8
Garymunida longipes	42.75	4.6
Garymunida longipes	38.43	3.1
Garymunida longipes	39.44	3.6
Garymunida longipes	40.78	3.9
Garymunida longipes	43.3	4.4
Garymunida longipes	34.63	2.7
Garymunida longipes	42.21	4.1
Garymunida longipes	40.63	3.8
Garymunida longipes	46.48	6.1
Garymunida longipes	38.73	3.5
Garymunida longipes	43.41	3.9
Garymunida longipes	47.77	5.9
Garymunida longipes	43.44	4.4
Garymunida longipes	44.74	5.1
Garymunida longipes	33.9	1.9
Garymunida longipes	35.19	1.9
Garymunida longipes	28.6	1.3
Garymunida longipes	42.52	3.5
Garymunida longipes	36.8	3.1
Garymunida longipes	43.39	4.1
Garymunida longipes	37.64	1.9
Garymunida longipes	49.42	5.9
Garymunida longipes	42.23	3.6
Garymunida longipes	29.05	1
Garymunida longipes	39.22	3.8
Garymunida longipes	47.68	3.8
Garymunida longipes	35.89	2.7
Garymunida longipes	42.55	3.9
Garymunida longipes	34.39	2.3
Garymunida longipes	33.62	1.7
Garymunida longipes	44.43	4.7
Garymunida longipes	47.09	4.8
Garymunida longipes	48.86	4.2
Garymunida longipes	49.07	6.1
Garymunida longipes	34.33	2.1
Garymunida longipes	43.16	4.5
Garymunida longipes	41.42	2.9
Garymunida longipes	47.36	5.1
Garymunida longipes	41.36	4
Garymunida longipes	34.28	1.7
Garymunida longipes	35.12	3.4
Garymunida longipes	34.11	2.2
Garymunida longipes	30.54	0.8
Garymunida longipes	36.28	2.7
Garymunida longipes	47.06	4.5
Garymunida longipes	38.67	2.5
Garymunida longipes	43.5	5.5
Garymunida longipes	44.96	5.2
Garymunida longipes	42.42	3.9
Garymunida longipes	34.63	2.2
Garymunida longipes	42.37	3.8
Garymunida longipes	42.33	3.9
Garymunida longipes	42.37	4
Garymunida longipes	38.29	3.6
Garymunida longipes	34.98	2.5
Garymunida longipes	32.96	1.9
Garymunida longipes	41	2.5
Garymunida longipes	42.46	4.4
Garymunida longipes	33.92	2.2
Garymunida longipes	30.44	1.3
Garymunida longipes	38.08	3
Garymunida longipes	40.56	2.5
Garymunida longipes	39.81	2.3
Garymunida longipes	37.6	2.3
Garymunida longipes	26.09	0.7
Garymunida longipes	42.69	4.2
Garymunida longipes	50.04	6.2
Garymunida longipes	44.06	3.3
Garymunida longipes	41.38	3.8
Garymunida longipes	37.33	2.7
Garymunida longipes	45.41	4
Garymunida longipes	47.41	4.1
Garymunida longipes	44.07	4.6
Garymunida longipes	40.2	3.9
Garymunida longipes	49.94	6.1
Garymunida longipes	34.27	1.5
Garymunida longipes	32.52	1.3
Garymunida longipes	39.26	3.3
Garymunida longipes	41.4	3.6
Garymunida longipes	46.94	5.8
Garymunida longipes	39.96	4
Garymunida longipes	46.55	5.7
Garymunida longipes	43.25	5.5
Garymunida longipes	41.42	3.8
Garymunida longipes	39.36	4
Garymunida longipes	37.94	3.5
Garymunida longipes	47.14	4.8
Garymunida longipes	36.94	3.4
Garymunida longipes	38.47	3.1
Garymunida longipes	39.01	3.5
Garymunida longipes	31.18	2.5
Garymunida longipes	41.86	4.8
Garymunida longipes	44.32	3.3
Garymunida longipes	43.87	5.2
Garymunida longipes	31.7	1.3
Garymunida longipes	38.52	3.4
Garymunida longipes	44.36	3.9
Garymunida longipes	41.87	4.5
Garymunida longipes	47.4	5
Garymunida longipes	42.14	4.2
Garymunida longipes	39.06	2.9
Garymunida longipes	32.3	1.8
Garymunida longipes	43.41	4
Garymunida longipes	45.69	4.7
Garymunida longipes	32.93	2.2
Garymunida longipes	43.3	3.9
Garymunida longipes	41.86	2.7
Garymunida longipes	43.58	4
Garymunida longipes	35	1.1
Garymunida longipes	44.28	4.5
Garymunida longipes	36.76	1.6
Garymunida longipes	40.59	3.4
Garymunida longipes	47.84	5
Garymunida longipes	44.45	4.8
Garymunida longipes	41.84	3.3
Garymunida longipes	37.67	3.6
Garymunida longipes	42.24	4
Garymunida longipes	33.21	1.8
Garymunida longipes	44.79	5.7
Garymunida longipes	37.52	2.4
Garymunida longipes	46.45	3.9
Garymunida longipes	45.08	3.3
Garymunida longipes	36.05	3
Garymunida longipes	48.21	4.4
Garymunida longipes	43.15	4.5
Garymunida longipes	48.73	4.5
Garymunida longipes	42.39	2.9
Garymunida longipes	44.66	3.9
Garymunida longipes	43.33	4.2
Garymunida longipes	41.76	3.6
Garymunida longipes	42.51	4.2
Garymunida longipes	38.02	2.9
Garymunida longipes	51.4	4.8
Garymunida longipes	46.61	3.9
Garymunida longipes	43.71	2.4
Garymunida longipes	45.17	4
Garymunida longipes	46.08	4
Garymunida longipes	42.91	4.6
Garymunida longipes	40.43	2.4
Garymunida longipes	36.36	2.3
Garymunida longipes	39.4	2.2
Garymunida longipes	38.18	2.1
Garymunida longipes	41.4	3.1
Garymunida longipes	40.5	2.8
Garymunida longipes	48.56	5.2
Garymunida longipes	39.72	3.6
Garymunida longipes	39.31	2.2
Garymunida longipes	42.94	2.9
Garymunida longipes	40.79	2.7
Garymunida longipes	43.29	4.5
Garymunida longipes	37.04	2.3
Garymunida longipes	34.61	1.9
Garymunida longipes	35.61	2.8
Garymunida longipes	33.74	1.6
Garymunida longipes	36.77	2.8
Garymunida longipes	42.85	4.6
Garymunida longipes	38.47	2.8
Garymunida longipes	47.65	4
Garymunida longipes	41.47	3.3
Garymunida longipes	46.71	3.3
Garymunida longipes	42.42	4.4
Garymunida longipes	46.73	4.2
Garymunida longipes	41.33	4.4
Garymunida longipes	39.31	3.3
Garymunida longipes	39.61	4
Garymunida longipes	40.54	3.9
Garymunida longipes	38.74	3.1
Garymunida longipes	42.14	3.4
Garymunida longipes	42.53	4.4
Garymunida longipes	41.57	2.5
Garymunida longipes	46.38	3.9
Garymunida longipes	37.82	1.9
Garymunida longipes	38.62	3.6
Garymunida longipes	46.7	5
Garymunida longipes	39.71	3.8
Garymunida longipes	39.81	2.2
Garymunida longipes	50.39	6.1
Garymunida longipes	42.04	4.4
Garymunida longipes	33.41	1.7
Garymunida longipes	39.46	3.4
Garymunida longipes	42.66	4.1
Garymunida longipes	41.56	3
Garymunida longipes	43.33	2.8
Garymunida longipes	39.8	4.2
Garymunida longipes	23.59	0.7
Garymunida longipes	39.45	2.9
Garymunida longipes	41.07	3.5
Garymunida longipes	42.22	5
Garymunida longipes	45.08	3.1
Garymunida longipes	32.59	2.1
Garymunida longipes	42.33	2.4
Garymunida longipes	23.67	0.7
Garymunida longipes	36.59	2.5
Garymunida longipes	40.15	3.9
Garymunida longipes	42.13	4.7
Garymunida longipes	42.05	3.1
Garymunida longipes	39.47	2.5
Garymunida longipes	46.08	5.1
Garymunida longipes	39.73	3.4
Garymunida longipes	39.71	3.3
Garymunida longipes	46.02	4.7
Garymunida longipes	44.54	5.1
Garymunida longipes	38.51	2.8
Garymunida longipes	41.37	2.5
Garymunida longipes	25.51	0.8
Garymunida longipes	42.03	3.8
Garymunida longipes	41.25	4.5
Garymunida longipes	39.23	1.7
Garymunida longipes	37.74	2.5
Garymunida longipes	46.12	3.9
Garymunida longipes	42.31	4.4
Garymunida longipes	43.96	4
Garymunida longipes	46.24	5.3
Garymunida longipes	44.98	4.8
Garymunida longipes	41.12	3.1
Garymunida longipes	42.33	4.7
Garymunida longipes	44.82	5
Garymunida longipes	46.1	3.8
Garymunida longipes	42.27	3.3
Garymunida longipes	31.45	2.1
Garymunida longipes	50.32	4.7
Garymunida longipes	39.55	2.7
Garymunida longipes	47.59	4
Garymunida longipes	47.74	4.5
Garymunida longipes	46.3	4
Garymunida longipes	40.09	2.3
Garymunida longipes	49.58	4.4
Garymunida longipes	49.75	5
Garymunida longipes	39.99	3.6
Garymunida longipes	43.81	3.5
Garymunida longipes	41.31	2.8
Garymunida longipes	46.73	2.9
Garymunida longipes	43.64	3.5
Garymunida longipes	30.33	1.2
Garymunida longipes	41.43	2.4
Garymunida longipes	38.86	1.3
Garymunida longipes	37.07	1.6
Garymunida longipes	41.04	3
Garymunida longipes	42.91	3.1
Garymunida longipes	46.9	3.4
Garymunida longipes	46.09	3.9
Garymunida longipes	45.52	3.5
Garymunida longipes	40.68	1.8
Garymunida longipes	42.23	2.9
Garymunida longipes	37.92	1.9
Garymunida longipes	36.19	1.7
Garymunida longipes	43.89	2.1
Garymunida longipes	43	3.1
Garymunida longipes	40.05	1.8
Garymunida longipes	47.77	4.4
Garymunida longipes	41.49	2.4
Garymunida longipes	38.92	2.7
Garymunida longipes	47.26	3.6
Garymunida longipes	44.69	4.7
Garymunida longipes	37.45	2.4
Garymunida longipes	44.01	3.4
Garymunida longipes	41.8	3
Garymunida longipes	43.39	2.1
Garymunida longipes	39.62	2.3
Garymunida longipes	46.34	3.8
Garymunida longipes	35.83	1.7
Garymunida longipes	44.71	3
Garymunida longipes	34.11	1.8
Garymunida longipes	35.68	1.6
Garymunida longipes	39.63	2.3
Garymunida longipes	52.35	6.2
Garymunida longipes	52.78	3.4
Garymunida longipes	41.37	1.3
Garymunida longipes	55.93	3.9
Garymunida longipes	46.94	3.5
Garymunida longipes	42.63	2.8
Garymunida longipes	49.16	3.8
Garymunida longipes	51.27	4.6
Garymunida longipes	45.71	3
Garymunida longipes	43.85	2.3
Garymunida longipes	44.09	2.7
Garymunida longipes	51.81	5.3
Garymunida longipes	54.12	4.7
Garymunida longipes	53.98	4.1
Garymunida longipes	42.24	3.5
Garymunida longipes	52.14	4.1
Garymunida longipes	46.86	3.5
Garymunida longipes	42.76	2.8
Garymunida longipes	49.16	3.1
Garymunida longipes	39.36	1.6
Garymunida longipes	53.51	5.7
Garymunida longipes	53.4	6.9
Garymunida longipes	50.09	5.5
Garymunida longipes	52.48	8.2
Garymunida longipes	57.43	7.9
Garymunida longipes	53.9	7.8
Garymunida longipes	54.8	7.2
Garymunida longipes	52.62	5.8
Garymunida longipes	49.23	5.8
Garymunida longipes	51.99	4.7
Garymunida longipes	40.02	2.4
Garymunida longipes	47.68	3.5
Garymunida longipes	48.73	2.8
Garymunida longipes	43.42	3
Garymunida longipes	49.95	4.2
Garymunida longipes	43.67	3.9
Garymunida longipes	53.1	6.9
Garymunida longipes	51.06	4.5
Garymunida longipes	44.76	2.8
Garymunida longipes	51.38	5.2
Garymunida longipes	50.33	4.1
Garymunida longipes	41.58	2.4
Garymunida longipes	43.68	3.8
Garymunida longipes	44.24	3.1
Garymunida longipes	56.6	5.8
Garymunida longipes	56.95	6.8
Garymunida longipes	41.4	2.7
Garymunida longipes	46.49	2.3
Garymunida longipes	41.06	2.4
Garymunida longipes	44.63	2.8
Garymunida longipes	39.8	2.1
Garymunida longipes	43.81	2.4
Garymunida longipes	45.3	3.4
Garymunida longipes	44.6	3.6
Garymunida longipes	48.51	4.4
Garymunida longipes	58.67	5.3
Garymunida longipes	52.59	4.7
Garymunida longipes	42.98	2.7
Garymunida longipes	50.21	4.4
Garymunida longipes	36.78	1.6
Garymunida longipes	49.21	3.6
Garymunida longipes	40.46	2.1
Garymunida longipes	30.99	1.1
Garymunida longipes	52.37	5.2
Garymunida longipes	46.97	4.5
Garymunida longipes	42.97	3
Garymunida longipes	34.41	1.8
Garymunida longipes	46.07	4.6
Garymunida longipes	45.86	3.1
Garymunida longipes	38.78	2.3
Garymunida longipes	50.12	4.5
Garymunida longipes	48.54	4.1
Garymunida longipes	45.49	3.3
Garymunida longipes	43.77	2.3
Garymunida longipes	47.16	5.1
Garymunida longipes	38.93	3.4
Garymunida longipes	49.87	4.8
Garymunida longipes	45.22	3.9
Garymunida longipes	41.2	2.1
Garymunida longipes	40.79	3.1
Garymunida longipes	38.39	2.5
Garymunida longipes	43.05	3.3
Garymunida longipes	54.21	6.4
Garymunida longipes	52.58	4.2
Garymunida longipes	45.95	3.1
Garymunida longipes	45.08	3.6
Garymunida longipes	47.66	4.1
Garymunida longipes	45.81	3.9
Garymunida longipes	47.15	3.9
Garymunida longipes	48.06	4.6
Garymunida longipes	33.34	1.7
Garymunida longipes	41.28	2.7
Garymunida longipes	41.11	2.4
Garymunida longipes	51.33	4.6
Garymunida longipes	47.69	6.1
Garymunida longipes	42.43	3.3
Garymunida longipes	43.2	3.8
Garymunida longipes	49.75	5.9
[truncated: 5,773 more rows]
